# Supplementary material
Source: publisher figshare collection journal article supplement (https://frontiersin.figshare.com/ndownloader/files/22807112)
Supplement: Supplementary file 1 [file 22807112]

|  | Feed with acetic acid | | | | | | |
| --- | --- | --- | --- | --- | --- | --- | --- |
|  | 24 | 18 | 12 | 6 | 3 | 2 | 1 |
| MPR (mmol/L(reactor)-d) | 11.4±0.2 | 16.2±0.2 | 22.7±0.4 | 40.3±0.4 | 40.2±1.7 | 34.6±3.4 | 31.0±4.2 |
| MPR (L/ L(reactor)-d) | 0.28 | 0.40 | 0.55 | 1.0 | 0.98 | 0.85 | 0.76 |
| MPR (mmol/L(feed)-d) | 11.4±0.2 | 12.2±0.1 | 11.2±0.2 | 10.1±0.1 | 5.0±0.2 | 2.9±0.3 | 1.3±0.2 |
| ECMPR (mmol/L(reactor)-d) | 1.1±0.0 | 0.7±0.0 | 1.1±0.0 | 1.1±0.0 | 1.1±0.0 | 1.2±0.0 | 1.0±0.0 |
| Methane % | 92 | 90 | 90 | 87 | 85 | 84 | 83 |
| Current (mA) | 1.5 | 0.9 | 1.8 | 1.4 | 1.5 | 1.7 | 1.4 |
| Effluent pH | 8.53 | 8.63 | 8.46 | 8.07 | 7.93 | 7.88 | 7.57 |
| COD consumption (mmol/L(reactor)-d) | 11.8±0.2 | 15.5±0.1 | 23.5±0.2 | 40.0±0.3 | 58.3±0.6 | 54.6±1.9 | 46.7±0.5 |
| Change in Alkalinity conc. (mmol/L(reactor)-d) | +7.5±0.6 | +4.4±0.7 | +20.3±0.9 | -12.9±1.3 | -5.3±6.1 | +2.9±9.2 | -45.7±14.8 |
| COD removal (%) | 38.7 | 40.6 | 41.7 | 36.5 | 25.6 | 18.6 | 8.6 |
| Heterotrophic methane share (%) | 103.8 | 95.6 | 103.3 | 97.5 | 144.7 | 158.3 | 105.5 |
| Electrochemical methane share (%) | 9.5 | 4.3 | 5.0 | 2.7 | 2.8 | 3.6 | 3.3 |
| Mass balance achieved (COD+Elec=Tot Meth) | 🗶 | ✓ | 🗶 | ✓ | 🗶 | 🗶 | 🗶 |
|  | Feed without acetic acid | | | | | | |
|  | 24 | 18 | 12 | 6 | 3 | 2 | 1 |
| MPR (mmol/L(reactor)-d) | 6.7±0.2 | 10.0±0.1 | 12.6±0.2 | 14.7±0.1 | 19.6±0.2 | 16.7±0.6 | 18.7±0.6 |
| MPR (L/L(reactor)-d) | 0.16 | 0.24 | 0.31 | 0.36 | 0.48 | 0.41 | 0.46 |
| MPR (mmol/L(feed)-d) | 6.9±0.2 | 7.4±0.1 | 6.3±0.1 | 3.7±0.0 | 2.5±0.0 | 1.3±0.0 | 0.8±0.0 |
| ECMPR (mmol/L(reactor)-d) | 1.6±0.0 | 1.5±0.0 | 1.4±0.0 | 1.3±0.0 | 1.5±0.0 | 1.4±0.0 | 1.4±0.0 |
| Methane % | 92 | 90 | 90 | 87 | 80 | 75 | 65 |
| Current (mA) | 1.95 | 2.00 | 1.70 | 1.65 | 1.93 | 1.8 | 1.75 |
| Effluent pH | 8.15 | 7.64 | 7.58 | 7.74 | 7.56 | 7.53 | 7.36 |
| COD consumption (mmol/L(reactor)-d) | 5.2±0.1 | 8.5±0.1 | 11.3±0.2 | 23.3±0.6 | 25.0±1.9 | 21.7±1.5 | 54.0±1.2 |
| Change in Alkalinity conc. (mmol/L(reactor)-d) | +2.8±0.5 | -6.1±0.8 | -1.9±1.2 | -22.1±3.3 | -12.6±7.7 | -60.2±4.5 | -131.2±17.1 |
| COD removal (%) | 19.3 | 23.4 | 20.5 | 21.6 | 13.7 | 7.3 | 9.4 |
| Heterotrophic methane share (%) | 77 | 86 | 90 | 159 | 127 | 130 | 200+ |
| Electrochemical methane share (%) | 23 | 14 | 10 | 9 | 8 | 8 | 7 |
| Mass balance achieved ((COD+Elec=Tot Meth) | ✓ | ✓ | ✓ | 🗶 | 🗶 | 🗶 | 🗶 |
